# Article

## 1 Consequences of recombination for the evolution of the mating type locus 2 in *Chlamydomonas reinhardtii*

3 Ahmed R. Hasan<sup>1,2</sup>, Jaspreet K. Duggal<sup>2</sup>, Rob W. Ness<sup>1,2</sup>

4 <sup>1</sup> Department of Cell and Systems Biology, University of Toronto, Toronto, ON M5S  
5 3G5, Canada

6 <sup>2</sup> Department of Biology, University of Toronto Mississauga, Mississauga, ON L5L  
7 1C6, Canada

8 Correspondence: Ahmed Hasan, [ahmed.hasan@mail.utoronto.ca](mailto:ahmed.hasan@mail.utoronto.ca)

9

10

11

12

13

14

15

16

17

18

19

20

21

22

23

24

25

## 26 Summary

27 *Rationale.* Recombination suppression in sex chromosomes and mating type loci  
 28 can lead to degeneration due to reduced selection efficacy and Muller’s ratchet effects.  
 29 However, genetic exchange in the form of non-crossover gene conversions may still  
 30 take place within crossover-suppressed regions. Recent work has found evidence that  
 31 gene conversion may explain the low levels of allelic differentiation in the dimorphic  
 32 mating type locus (*MT*) of the isogamous alga *Chlamydomonas reinhardtii*. However,  
 33 no one has tested whether gene conversion is sufficient to avoid the degeneration of  
 34 functional sequence within *MT*.

35 *Methods.* Here, we calculate levels of linkage disequilibrium (LD) across *MT*  
 36 as a proxy for recombination rate and investigate its relationship to patterns of  
 37 population genetic variation and the efficacy of selection in the region.

38 *Results.* We find that levels of LD predict selection efficacy across *MT*, and that  
 39 purifying selection is stronger in shared genes than *MT*-limited genes to the point of  
 40 being equivalent to that of autosomal genes.

41 *Conclusions.* We argue that isogamous systems without secondary sexual char-  
 42 acteristics exhibit reduced selective pressure to differentiate sex chromosomes, and  
 43 that recombination via gene conversion plays an important role in both reducing  
 44 differentiation and preventing degeneration of crossover suppressed mating type loci.

45

46 Keywords: *Chlamydomonas*, gene conversion, mating type loci, organelle inheritance,  
 47 sex chromosome degeneration

48

49

50

51

52

## 53 Introduction

54 Sexual reproduction is widespread across both unicellular and multicellular eukaryotes  
 55 primarily to shuffle genetic material between compatible mates. Despite the role  
 56 of sex in promoting recombination and therefore improving the efficacy of selection  
 57 in the genome, evidence and theory suggest that sex or mating-type determining  
 58 regions themselves are often recombination-suppressed ([Bachtrog et al., 2011](#), [Abbott](#)  
 59 [et al., 2017](#)). Recombination suppression in these regions is thought to be a result  
 60 of selection to preserve linkage between sex-determining loci that and sexually  
 61 antagonistic alleles ([Charlesworth, 1996](#); but see [Branco et al. 2017](#) and [Ponnikas](#)  
 62 [et al. 2018](#)). Through time, the region over which recombination is suppressed  
 63 can expand and potentially form complete sex chromosomes. The suppression  
 64 of recombination in mating-type determining regions or chromosomes has major  
 65 consequences for their molecular evolution relative to the remainder of the autosomal  
 66 genome and poses questions about how their function is maintained over evolutionary  
 67 time ([Bergero and Charlesworth, 2009](#), [Wright et al., 2016](#)).

68 Y-chromosome-degeneration is one of most well-known and best-documented  
 69 cases of the altered evolutionary trajectory of sex chromosomes. Y-chromosomes  
 70 have undergone substantial erosion of gene content and has accumulated repetitive  
 71 elements in many taxa ([Bachtrog, 2006, 2013](#)), such as plants ([Ming et al., 2011](#)),  
 72 mammals ([Graves, 2006](#)), birds ([Berlin and Ellegren, 2006](#)), and insects ([Singh et al.,](#)  
 73 [2014](#)). Y-chromosome degeneration is believed to be a consequence of the suppression  
 74 of recombination that defines these sex determining regions. One major consequence  
 75 of reduced recombination is the Hill-Robertson effect, wherein selection is less effective  
 76 due to interference between selected loci at linked sites ([Hill and Robertson, 1966](#),  
 77 [Charlesworth and Charlesworth, 2000](#), [Hough et al., 2017](#)). Additionally, Muller's  
 78 ratchet results in the irreversible accumulation of deleterious mutations due to  
 79 stochastic loss of the least mutated haplotype ([Muller, 1964](#), [Felsenstein, 1974](#),  
 80 [Gordo and Charlesworth, 2001](#)). Lastly, recombination suppression can result in

81 reduced efficacy of selection against structural mutations, including transposable  
82 element insertions, gene loss, and chromosomal inversions. Such structural mutations,  
83 particularly chromosomal inversions, also drive further reductions in recombination  
84 by disrupting pairing of homologous chromosomes in meiosis and can therefore  
85 expand the boundaries of sex- or mating type-determining regions (Lahn and Page,  
86 1999, Kirkpatrick, 2010, Wright et al., 2016).

87 The distinction between the sexes ultimately stems from the difference in the  
88 size and investment into their respective gametes (Kodric-Brown and Brown, 1987).  
89 In such anisogamous systems, selective pressure for secondary sexual characteristics  
90 has the potential to favour sexually antagonistic alleles and drive the evolution of  
91 completely differentiated sex chromosomes (Bell, 1978, Charlesworth, 1978). In  
92 isogamous systems (i.e. with equal sized gametes), compatible mates are known as  
93 mating-types (Charlesworth, 1978, Hoekstra, 1987); the genetic loci that determine  
94 these mating-types are often smaller than complete chromosomes, but still frequently  
95 involve the suppression of recombination and subsequent genetic differentiation  
96 (Fraser and Heitman, 2004). Many well-documented examples of mating type locus  
97 evolution come from Volvocine green algae (Chlorophyta) which include the isoga-  
98 mous unicellular model organism *Chlamydomonas reinhardtii* and the multicellular  
99 anisogamous alga *Volvox carteri* (Umen, 2011, Umen and Olson, 2012). Unlike  
100 mating types from familiar yeast species (Dujon, 2010), mating type can not switch  
101 in *C. reinhardtii*, and is inherited as a single Mendelian trait (Goodenough et al.,  
102 2007). In *C. reinhardtii*, mating types are determined by a haploid, genetically  
103 encoded  $\sim 500$  kb mating type locus (henceforth *MT*) on chromosome 6, whose  
104 allelic state encodes an individual as either *MT*<sup>+</sup> and *MT*<sup>-</sup>. *MT* is subdivided into  
105 three domains: the centremost is known as the R domain, where recombination is  
106 suppressed. The R domain carries chromosomal inversions and repetitive regions  
107 (Ferris and Goodenough, 1994) as well as numerous genes that are common to both  
108 *MT* alleles. There are also a small number of *MT*-limited genes, including the

109 *MT*<sup>-</sup> gene *mid* that determines mating type specificity and the *MT*<sup>+</sup> gene *fus1*  
 110 that facilitates fusion of compatible gametes (Ferris and Goodenough, 1997, Lin  
 111 and Goodenough, 2007). Flanking the R domain are the telomere-proximal and  
 112 centromere-proximal domains (T and C domains, respectively), which unlike the R  
 113 domain are relatively syntenic (Ferris et al., 2002, De Hoff et al., 2013). Interestingly,  
 114 *MT* also ensures organelle inheritance in *C. reinhardtii*: following sex between two  
 115 haploid gametes, a diploid zygote forms, in which degradation of the chloroplast  
 116 genome inherited from the *MT*<sup>-</sup> parent and the mitochondrial genome from the *MT*<sup>+</sup>  
 117 parent occurs prior to the final meiotic event, thus causing uniparental inheritance  
 118 (Nishimura et al., 1999, Goodenough et al., 2007, Nishimura, 2010). However, both  
 119 experimental and population genetic evidence suggests that the chloroplast genome  
 120 may undergo recombination during meiosis and that uniparental inheritance may be  
 121 leaky (Sager, 1954, Gillham, 1969, Ness et al., 2016).

122 Although crossing over within the *MT* locus is suppressed, the three domains  
 123 (T, R, and C) altogether contain 57 shared homologous genes. In a recent genetic  
 124 analysis of five shared genes, two of them, *PDK1* and *PR46*, were shown to have  
 125 undergone ‘cryptic recombination’ in the form of gene conversion between *MT* alleles  
 126 (De Hoff et al., 2013). In this investigation of *MT*, De Hoff and colleagues showed  
 127 that diversity and divergence between these five shared genes were comparable to  
 128 those of autosomal genes, suggesting genetic exchange was frequent enough in *MT*  
 129 to prevent divergence between homologs. From a population genetic perspective, the  
 130 presence of recombination predicts that selection efficacy may be higher in shared  
 131 regions despite suppressed crossing-over (Felsenstein, 1974, Comeron et al., 2008) and  
 132 therefore may provide a mechanism by which *MT* regions can avoid the degeneration  
 133 observed in many Y-chromosomes. Moreover, we may also expect consequences  
 134 of gene conversion on base composition through either more efficient selection on  
 135 codon usage (Hey and Kliman, 2002) or via the process of GC-biased gene conversion  
 136 (Galtier and Duret, 2001, Marais, 2003). However, to date, no full-scale investigation

of the extent of recombination across the *MT* locus has been conducted, nor the consequences of varying recombination across the region.

Here, we investigate the occurrence and extent of linkage disequilibrium across the entire *C. reinhardtii* mating type locus and report an analysis of its effects on the population genetics and molecular evolution of the shared and *MT*-limited regions. Specifically, we address the following questions: 1) What are the spatial patterns of LD across *MT* including the flanks, T, R and C domains? 2) Do patterns of polymorphism or divergence between *MT* alleles reflect the strength of LD? 3) Do shared and *MT*-limited regions show evidence for differences in selection efficacy? 4) Do patterns of inter-chromosomal LD between mating type alleles and organelle genomes suggest leaky uniparental inheritance? To answer these questions, we characterize the landscape of linkage disequilibrium (LD) across shared regions and relate it to patterns of polymorphism within and surrounding coding sequence from a population genomic data set.

## Materials and Methods

*Strains, sequencing, and alignment.* We used whole genome sequence data from 19 (9 *MT*<sup>+</sup>, 10 *MT*<sup>-</sup>) natural strains of *Chlamydomonas reinhardtii*, sampled from Quebec, Canada. Strains CC-2935, CC-2936, CC-2937, and CC-2938 were obtained from [Flowers et al. \(2015\)](#), while the remainder were originally published in [Ness et al. \(2016\)](#) (Table S1). We used the *C. reinhardtii* v5.3 reference genome ([Merchant et al., 2007](#)) but because it is derived from an *MT*<sup>+</sup> individual and does not include organelles, we appended the chloroplast genome, the mitochondrial genome, and the *MT*<sup>-</sup> locus (GenBank accession GU814015.1) to allow mapping of reads derived from these regions. We then aligned reads for strains from the two mating types as follows: for *MT*<sup>+</sup> individuals, we masked the *MT*<sup>-</sup> locus prior to alignment; then, for *MT*<sup>-</sup> individuals, we masked the location of the T and R domains of the *MT*<sup>+</sup> allele in the reference genome

(chromosome\_6:298298-826737) prior to alignment. Masking ensured alignment of reads to the correct mating type allele. The C domain was not masked as it is completely syntenic across both alleles (De Hoff et al., 2013) and is not included in the *MT*<sup>-</sup> sequence. We used the GATK v3.3 tools HaplotypeCaller and GenotypeGVCFs for variant calling (non default settings: ploidy=1, includeNonVariantSites=true, heterozygosity=0.02, indel\_heterozygosity=0.002).

*Identification and alignment of shared regions.* To identify shared regions between the two mating type loci, we used the pairwise aligner LASTZ 1.04 (Harris, 2007) on FASTA files containing the reference sequences of T and R domains across both mating type alleles. The *MT*<sup>+</sup> locus was assigned as the target and the *MT*<sup>-</sup> the query. We used a score threshold of 30000; default parameters were otherwise retained. Cases of multiple *MT*<sup>-</sup> hits to the same *MT*<sup>+</sup> region, defined as two or more alignments with at least 75% overlap in their *MT*<sup>+</sup> sequence coverage, were resolved by selecting the highest-scoring match. All alignments were visually inspected using the LASTZ visualizer plugin in Geneious 11.1.4 ([www.geneious.org](http://www.geneious.org)). Using the *MT*<sup>+</sup> allele (which is approximately 200 kb longer than the *MT*<sup>-</sup> allele) positions as a reference, we concatenated individually aligned segments into a single FASTA alignment the length of the *MT*<sup>+</sup> allele that contained only shared regions across all *MT*<sup>+</sup> and *MT*<sup>-</sup> strains as output by LASTZ. In this merged alignment, non-shared regions were instead denoted as N across both alleles to preserve the chromosomal positions of shared regions relative to the *MT*<sup>+</sup> reference. Finally, because the C domain of the *C. reinhardtii* mating type locus is absent from the *MT*<sup>-</sup> sequence and syntenic across both mating type alleles (Ferris and Goodenough, 1997, De Hoff et al., 2013) we directly appended it to the 3' end of the merged alignment.

*Recombination rate estimation.* To estimate recombination rate variation using patterns of linkage disequilibrium (LD), we estimated levels of disequilibrium using a Python script. Over all shared regions, we calculated the  $r^2$  measure of LD (Hill and Robertson, 1968) for all pairwise combinations of diallelic, non-singleton SNPs within

1 kb of one another. We only considered windows with a minimum of 30 polymorphic sites. Next, we averaged these  $r^2$  values with  $Z_{nS}$  (Kelly, 1997) in non-overlapping 1 kb windows.  $Z_{nS}$  is the average pairwise LD over all variant sites in a given region, defined as follows:

$$Z_{nS} = \frac{2}{S(S-1)} \sum_{i=1}^{S-1} \sum_{j=i+1}^S r_{i,j}^2$$

Where  $S$  is the set of polymorphic sites in the region of interest,  $i$  and  $j$  correspond to a pair of variant sites within  $S$ , and  $r_{i,j}^2$  is the square of the correlation coefficient ( $r^2$ ) between the two loci. Like  $r^2$ ,  $Z_{nS}$  values range from 0 to 1, with 0 representing linkage equilibrium while a value of 1 indicates complete association. To then visualize broader spatial trends of LD, we then fit a hidden Markov model with three states to  $Z_{nS}$  scores over the mating type locus using the R package `depmixS4` (Visser and Speekenbrink, 2010).

*Identification, alignment, and analysis of coding sequence polymorphism.* We identified pairs or shared genes from the MT locus alleles using a multi-faceted approach. Firstly, we used the gene IDs present in the genome annotation of *C. reinhardtii* reference v5.3 (Merchant et al., 2007) and the MT- sequence. For those genes that were not paired based on gene ID, we performed a reciprocal best BLAST using BLASTn and incorporated shared pairs not already included. Lastly, we resolved a small number of shared pairs using the definitions provided in Table S4 of De Hoff et al. (2013). After excluding the shared genes, we identified MT-limited genes as those with no BLAST hit on the opposite MT locus. MT-limited gene definitions overlapped previous definitions of MT-limited genes; however, gene copies from the 16 kb repeat in the MT+ allele were not included because sequence from these genes was not reliable due to the short-reads used in our study. For comparison to MT genes, we also extracted sequence from chromosome 6 genes outside of the MT locus and 1000 random genes from the rest of the nuclear genome. After extracting CDS sequences of all individuals from each gene or gene pair, we aligned the sequences



based on their translated amino acid sequence using MUSCLE v3.8.31 (Edgar, 2004) and then back translated each to its original nucleotide sequence. All alignments were visually inspected to ensure accuracy. We masked regions where meaningful alignment was impossible, likely due to large insertion/deletion events. Alignments and alignment edits are available at <https://github.com/aays/2019-mt-locus>.

For each alignment, we calculated population genetic statistics for  $MT^-$  strains,  $MT^+$  strains, and all samples combined. For individual MT groups and  $MT$ -limited genes, we excluded sites with fewer than 8 called alleles, while for genes shared across both mating type alleles we excluded sites with fewer than 12 alleles called. Within coding sequence, we estimated genetic diversity as  $\theta_\pi$  for 0- and 4-fold degenerate sites for each  $MT$  grouping. We also summarized genetic differentiation within and between  $MT$  alleles using  $F_{ST}$ , as well as the number of shared,  $MT$ -private and fixed differences. We also calculated the above population genetic statistics from the same sample groups for genes outside the  $MT$  locus where recombination is assumed to be present.

*Population genetic consequences of recombination rate variation.* We then used our  $Z_{nS}$  scores to investigate the effect of recombination on mating type evolution. First, to examine the effects of recombination on divergence between  $MT$  alleles, we computed  $F_{ST}$  in non-overlapping 1 kb windows over the shared regions of the  $MT$  locus, and compared these windowed estimates to the windowed  $Z_{nS}$  values described above.

To then investigate whether recombination affects selection efficacy over the  $MT$  locus, we computed the ratio of nonsynonymous to synonymous diversity ( $\pi_N/\pi_S$ ) and  $Z_{nS}$  over the coding sequences of each shared gene.  $\pi_N/\pi_S$  values below 1 are indicative of purifying selection, with smaller values suggesting greater selection efficacy.

To test for an effect of recombination on GC-content evolution, either due to selection or GC biased gene conversion, we calculated the GC content of 4-fold

degenerate sites (GC4) in *MT*-limited and shared genes. Outside of coding sequence, we calculated the GC content of shared sites annotated as intron or intergenic using the *MT+* reference sequence, to which the alignments were oriented. In *MT*-limited regions, the GC content of intron and intergenic sites was calculated with respect to annotations from the corresponding mating type.

*LD-based analyses of organelle inheritance.* To assess leakage in organelle inheritance, we calculated inter-chromosomal LD between each organelle and mating type limited-genes from the corresponding mating type. First, the GATK program HaplotypeCaller was used to generate mating type-separated VCF files containing either of *MT+* individuals and *MT-* individuals. A Python script using PyVCF-0.6.8 was used to compute Lewontin's D' statistic (Lewontin, 1964) between organelle genomes and corresponding mating type-specific markers: *mta1* and *fus* in the case of the *MT+*, and *mta1* and *mta2* with the *MT-*. The D' statistic normalizes values of D between loci, such that a value of 1 always represents complete linkage.

In addition to organelle-to-mating type comparisons, intra-region D' was calculated in the *MT-* mitochondrial genome with the expectation of complete linkage. Finally, estimates of inter-chromosomal LD across the genome were calculated for use as a null expectation. Given the density of SNPs in the genome of *C. reinhardtii* ( $> 10.2 \times 10^6$  across the 17 chromosomes), random filtering to 0.02% was applied, so that approximately 1700 arbitrarily selected variants from the entire genome underwent LD calculations for a total of  $7.5 \times 10^5$  pairwise comparisons. Only diallelic and non-singleton SNPs were used in all calculations.

All scripts used in this work can be found at <https://github.com/aays/2019-mt-locus>. All data analysis and visualization was performed in R (R Core Team, 2018) using the tidyverse suite of packages (Wickham, 2017).

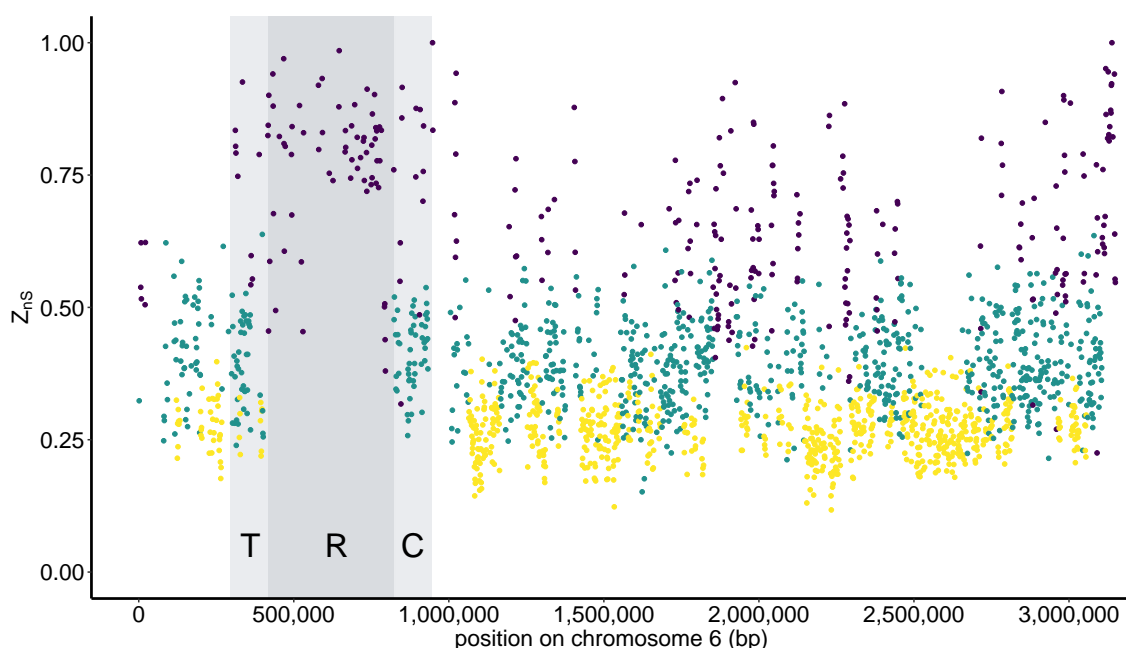

Figure 1: Variation in  $Z_{nS}$  over chromosome 6. Each point represents LD in a 1 kb window of shared sequence across both *MT* alleles. A hidden Markov model with three states was fit to the data to better visualize spatial trends; states are represented with point colouration.

## 270 Results

### 271 Breakdown of linkage disequilibrium across the C and T do- 272 mains

273 Following alignment of the two *MT* alleles, we calculated LD over the *MT* locus and  
274 the remainder of chromosome 6 as a proxy for recombination (i.e. gene conversion),  
275 such that regions with higher  $Z_{nS}$  were considered to have lower recombination  
276 rates. The distribution of  $Z_{nS}$  values over the *MT* locus and surrounding autosomal  
277 sequence is shown in Figure 1. As expected, we observe a strong elevation in LD in  
278 the R domain (mean  $Z_{nS} = 0.76$ ) as compared to the T domain (mean  $Z_{nS} = 0.442$ )  
279 or the C domain (mean  $Z_{nS} = 0.473$ ). By contrast, LD levels in the C and T domains  
280 approximate autosomal levels (mean chromosome 6  $Z_{nS} = 0.359$ ), suggesting more  
281 frequent recombination in these regions.

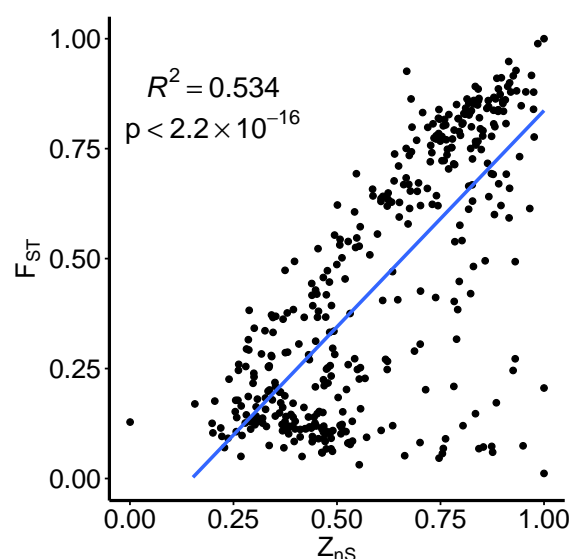

Figure 2: Relationship between differentiation ( $F_{ST}$ ) and LD ( $Z_{nS}$ ). Each point represents a 1 kb window of shared sequence between both *MT* alleles.

## 282 Differentiation between shared regions inversely scales with 283 recombination rate

284 Gene conversion between *MT* alleles in shared genes is expected to reduce allelic  
285 differentiation. To test this prediction, we calculated  $F_{ST}$  over shared regions in 1  
286 kb windows and examined its relationship with  $Z_{nS}$ . We find a strong relationship  
287 (Fig. 3,  $R^2 = 0.534$ ,  $p < 2.2 \times 10^{-16}$ ), suggesting recombination via gene conversion  
288 is an effective mode to homogenize genetic variation between *MT* alleles.

## 289 Genes with higher recombination rates exhibit higher selection 290 efficacy and GC content

291 Recombination reduces interference between selected sites (Hill-Robertson effects)  
292 and thus improves the efficacy of selection to fix beneficial and purge deleterious  
293 mutations (Hill and Robertson, 1966, Felsenstein, 1974). Hill-Robertson effects result  
294 in a net reduction in linked neutral diversity due to either background selection or  
295 selective sweeps. Thus, we expect nucleotide diversity ( $\pi$ ) in shared genes to be  
296 higher than that of *MT*-limited genes, which we found to be the case ( $\pi$  in shared

genes = 0.0168,  $\pi$  in  $MT+$  genes = 0.0037,  $\pi$  in  $MT-$  genes = 0.0022). We also find that  $\pi$  in each mating type correlates negatively with  $Z_{nS}$ , suggesting that genes that undergo more recombination exhibit reduced effects of selection at linked sites (Fig. 3a;  $MT+$ :  $R^2 = 0.134, p = 0.016$ ;  $MT-$ :  $R^2 = 0.187, p = 0.0047$ ). Mean  $\pi$  in  $MT$  ( $\pi = 0.0168$ ) is about half of autosomal diversity ( $\sim 0.03$ , Flowers et al. 2015) though  $MT+$  diversity is about half of  $MT-$  diversity ( $MT+$   $\pi = 0.0065$ ,  $MT-$   $\pi = 0.0112$ ).

To then test whether genes with higher recombination rates undergo more efficient purifying selection, we calculated both the ratio of nonsynonymous to synonymous diversity ( $\pi_N/\pi_S$ ) as well as  $Z_{nS}$  in the coding regions of both shared and  $MT$ -limited genes in the  $MT$  locus.  $\pi_N/\pi_S$  almost always ranges from 0 to 1, with lower values suggesting more efficient selection; values above 1 are rare, and instead suggest that balancing selection may be acting to preserve nonsynonymous diversity.

Here, weighting by the number of sites in each gene, we find a weakly positive relationship between  $Z_{nS}$  and  $\pi_N/\pi_S$ , suggesting that regions of higher recombination also show more efficient selection (Fig. 3b,  $R^2 = 0.106, p = 0.043$ ). This result excludes two genes, *MT0796* and *522915*, which showed extreme values of  $\pi_N/\pi_S$  (1.85 and 3.35 respectively); including these outlier genes makes the fit marginally nonsignificant ( $R^2 = 0.094, p = 0.051$ ) but the direction of the relationship remains the same.

We next examined whether recombination rate affected GC content in shared genes. Either or both of GC-biased gene conversion or selection on base composition are expected to drive increases in GC content in regions of higher recombination. Here, we calculated GC content at intronic, intergenic, and four fold degenerate sites (GC4) in 1 kb windows across shared regions, and found a significant but very weakly negative relationship between GC content and  $Z_{nS}$  ( $R^2 = 0.023, p = 0.00028$ , slope =  $-0.048$ ).

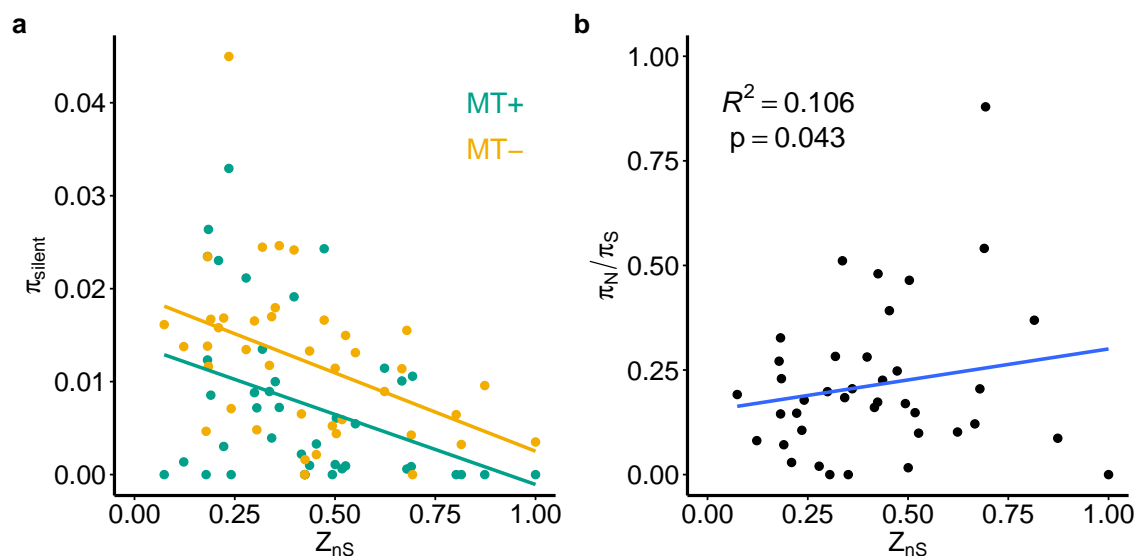

Figure 3: **a.** LD ( $Z_{ns}$ ) and neutral diversity at shared genes, grouped by mating type. **b.**  $\pi_N/\pi_S$  shows a weakly positive relationship with  $Z_{ns}$ . In both plots, each point represents a gene with copies in both *MT* alleles.

### 323 Contrasting selection efficacy and GC-content evolution in *MT* 324 with autosomal genes

325 To examine how selection efficacy in *MT*-limited and shared genes compares to  
326 that of autosomal genes, we then calculated  $\pi_N/\pi_S$  for 100 randomly sampled  
327 genes from chromosome 6 in addition to a further 100 randomly selected autosomal  
328 genes from across the remainder of the genome. Across the four annotations (*MT*-  
329 limited, shared, chromosome 6, and autosomal), a Kruskal-Wallis test showed no  
330 significant differences in  $\pi_N/\pi_S$  ( $\chi^2 = 2.623, p = 0.454$ ) indicating that selection  
331 efficacy in shared *MT* genes is similar to that of non-*MT* genes. While this result  
332 also surprisingly suggests no significant difference in selection efficacy between *MT*-  
333 limited genes and autosomal genes, this comparison is likely underpowered by the  
334 fact that there are only 7 *MT*-limited genes in *MT* as compared to 51 shared *MT*  
335 genes included in our analysis.

336 We repeated the above analysis for GC4 across the four annotations of interest,  
337 but using our estimates of GC4 in 1 kb windows instead of genic values. Here, a

Kruskal-Wallis test showed significant differences in GC4 ( $\chi^2 = 15.75, p = 0.0013$ ). Subsequent paired Wilcoxon rank-sum tests showed that only differences in GC4 between shared genes and autosomal genes (both chromosome 6 and the randomly sampled dataset) were significantly different ( $p = 0.016$  and  $p = 0.00098$  for shared-chromosome 6 and shared-autosomal, respectively), with GC4 in shared genes higher in both cases. Interestingly, GC content levels for the *MT*-limited genes *MID* and *FUS1* were drastically lower than the remainder of the *MT* locus and the *C. reinhardtii* genome as a whole (*MID* GC4 = 0.526, *FUS1* GC4 = 0.396), despite the overall similarities seen in GC4 between shared and *MT*-limited regions (Table 1).

|               | statistic | <i>MT</i> -limited | Shared | Chromosome 6 | Autosomal |
|---------------|-----------|--------------------|--------|--------------|-----------|
| $\pi_N/\pi_S$ | mean      | 0.403              | 0.306  | 0.270        | 0.321     |
|               | median    | 0.443              | 0.184  | 0.202        | 0.236     |
| GC4           | mean      | 0.761              | 0.803  | 0.767        | 0.750     |
|               | median    | 0.790              | 0.803  | 0.768        | 0.760     |

Table 1: Summary of  $\pi_N/\pi_S$  and GC content across annotations examined.

## Breakdown of inter-chromosomal LD suggests biparental chloroplast inheritance

To test for evidence of leakage in uniparental organelle inheritance, we calculated pairwise LD ( $D'$ ) between SNPs from 1) the chloroplast genome and the *MT+* specific genes *fus* and *mta1*, 2) the mitochondrial genome and the *MT-* specific gene *mta1*, 3) the *MT-* mitochondrial genome with itself, and 4) randomly sampled SNPs across all 17 chromosomes of *C. reinhardtii*. The distribution of obtained  $D'$  values for these comparisons is shown in Figure 4.

LD between the chloroplast genome and corresponding *MT+* markers displays a large proportion of sites in complete linkage but also a clear pattern of LD breakdown (Fig. 4a; mean  $D' = 0.611$ ) thus implicating recombination between chloroplast genomes or some bi-parental inheritance. Interestingly, this appears to be an even

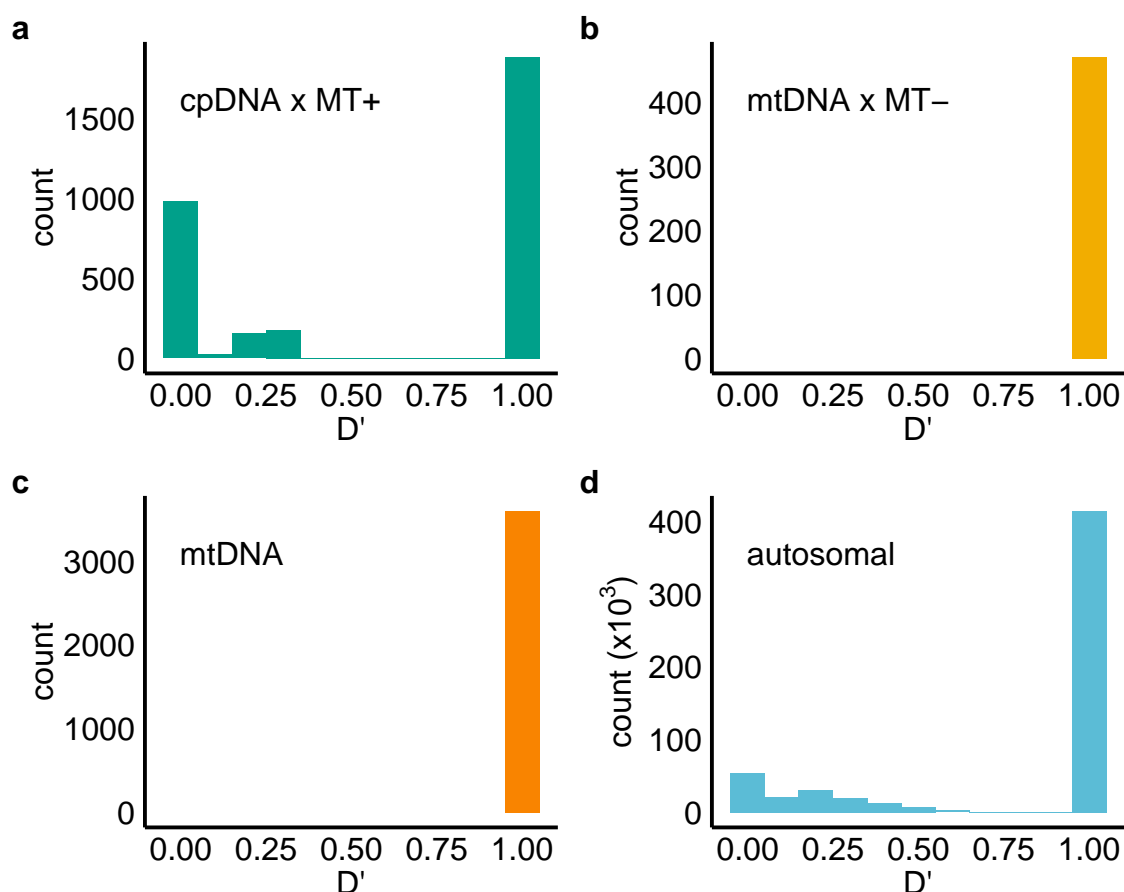

Figure 4: Distribution of  $D'$  for SNPs across: **a.** cpDNA and  $MT+$ . **b** mtDNA and  $MT-$ . **c** The mitochondrial genome. **d.** Randomly drawn pairs of SNPs from across the genome.



lower level of inter-chromosomal LD than is observed in randomly selected pairs (Fig. 4d; mean  $D' = 0.781$ ). In contrast, the mitochondrial genome is in complete LD with the *MT*-limited genes (mean  $D' = 1.0$ ).

## Discussion

While many models of sex chromosome and mating type locus evolution require an initial suppression of recombination, the evolutionary trajectory of mating type and sex determining regions may differ substantially. Previous work comparing the *MT* locus of *C. reinhardtii* with that of its anisogamous, multicellular relative *Volvox carteri* showed that *C. reinhardtii* *MT* alleles were two orders of magnitude less diverged by comparison, despite the two species sharing a homologous *MT* locus (Ferris et al., 2010). The subsequent finding that infrequent gene conversion was occurring between the two *C. reinhardtii* *MT* alleles provided an explanation for why the shared regions were not differentiated (De Hoff et al., 2013). Here, we examine patterns of coding and non-coding genetic diversity across the entire *MT* locus to estimate the extent of recombination rate variation and its consequences for selection on *MT* genes. We show that recombination rate predicts the degree to which shared regions have differentiated across *MT* haplotypes, and that genes with higher recombination rates exhibit greater selection efficacy against deleterious alleles. Furthermore, we use patterns of LD breakdown to show evidence for biparental inheritance of the chloroplast genome but not the mitochondrial genome.

Over the *MT* locus, we observe strongly elevated LD in the R domain, while LD in the flanking T and C domains resemble autosomal levels (Fig. 1). The pattern we show is expected, given that the T and C domains are highly syntenic while the R domain contains inversions and autosomal translocations (Ferris and Goodenough, 1994, Ferris et al., 2002, De Hoff et al., 2013), resulting in recombination suppression (Charlesworth, 1994, Wright et al., 2016). Although LD is elevated in the R domain,

it is noteworthy that  $Z_{nS}$  is below 1 and comparable to other regions of chromosome 6 with high LD. It is in fact the absence of low LD windows in the R domain that differentiates it from the rest of the chromosome. Our hidden Markov model of recombination rate did not delineate a clear boundary at which recombination suppression begins on either bound of the R domain, similar to findings in the pseudo-autosomal regions of human sex chromosomes (Cotter et al., 2016). However, LD patterns in the T and C domains are indistinguishable from those of the surrounding autosomal regions. Although early evidence from laboratory crosses suggested the entirety of *MT* was recombination suppressed (Ferris and Goodenough, 1994), our results mirror those of De Hoff et al. (2013) in suggesting that both crossing over and non-crossover gene conversions may be occurring in these regions. Patterns of LD between *MT+* genes and the chloroplast genome also clearly support the existence of recombination and/or biparental inheritance in the chloroplast, in line with previous results (Boynton et al., 1987, Nakamura, 2010, Ness et al., 2016). In contrast, no such evidence exists for the *MT-* genes and the mtDNA, supporting strict uniparental inheritance of the mitochondria even over long evolutionary timescales.

Our results demonstrate that gene conversion has important consequences for the molecular evolution of *MT*. Firstly, we show that across the *MT* locus, shared regions with higher rates of recombination exhibit less differentiation between mating types ( $F_{ST}$ , Fig. 2a), as would be expected in a program where gene conversion is widespread in the shared regions of the *MT* locus. Increased  $F_{ST}$  in shared regions could result from both lower rates of gene conversion or selection to retain alleles with *MT*-specific selective effects. Although less selection on secondary sex characteristics is expected in isogamous systems, differential expression of shared genes between mating type alleles can still create selective pressure for allelic differentiation (Immler and Otto, 2015), and has been previously observed in the *C. reinhardtii* *MADS2* (De Hoff et al., 2013). Thus, the possibility that differential expression may be playing a role alongside gene conversion in determining differentiation levels cannot be excluded

until allele-specific expression data across more shared genes are obtained. Finally, gene conversion across the *MT* locus is also expected to affect local GC content. Recent work on the strength of gBGC in *C. reinhardtii* found a significant GC bias in noncrossover gene conversions (Liu et al., 2017). Consistent with predictions from gBGC, we found that GC content was highest in shared *MT* genes, and that the *MT*-limited genes *MID* and *FUS1* had extremely low GC content.

We predicted that selection against deleterious mutations across the *MT* locus would be weaker in regions with less recombination due to interference between selected sites (Hill and Robertson, 1966, Felsenstein, 1974, Comeron et al., 2008). Indeed, we found that diversity levels were lower in shared genes with low recombination (Fig. 2a), while diversity in *MT*-limited genes was an order of magnitude lower than in shared genes. Both of these findings are consistent with background selection reducing neutral diversity. We see lower diversity in *MT*<sup>+</sup> than *MT*<sup>-</sup>, which may be reflective of previous reports that gene conversion in *MT* is biased in favour of *MT*<sup>+</sup> to *MT*<sup>-</sup> conversions (De Hoff et al., 2013), although the negative correlation between  $\pi$  and  $Z_{nS}$  is still present in both alleles (Fig. 3a). Furthermore, *MT* regions with higher LD exhibited higher  $\pi_N/\pi_S$  ratios, indicative of reduced purifying selection (Fig. 3b). Interestingly, the overall level of  $\pi_N/\pi_S$  in shared genes was not significantly different from those of autosomal genes, suggesting that gene conversion in shared genes may be enough to maintain equivalent levels of selection efficacy. With Hill-Robertson effects being a key mechanism in the degeneration of sex chromosomes (Bachtrog, 2013), this suggests that gene conversion is sufficient to facilitate effective purifying selection and prevent the accumulation of deleterious variants in *MT* in the absence of crossovers. Additionally, unlike crossovers, gene conversions can occur between inversions (Korunes and Noor, 2017), as previously observed in the R domain of *MT* (De Hoff et al., 2013). Similar patterns of periodic inter-chromosomal gene conversion for putatively adaptive purposes have been observed in the sex chromosomes of European tree frogs (Stöck et al., 2011), avian sex

chromosomes (Wright et al., 2014), fungal mating type loci (Menkis et al., 2010, Sun et al., 2012), and in certain mammalian sex-linked orthologs (Pecon Slattery et al., 2000, Rosser et al., 2009, Peneder et al., 2017, Trombetta et al., 2017). However, the effect of gene conversion on selection efficacy in these regions has not yet been investigated.

Theoretical models predict reduced recombination between haploid sex chromosomes if different sexes undergo differing selective pressures (Immler and Otto, 2015), such as in anisogamous systems. The *MT* locus of *V. carteri*, for instance, is five times larger than *C. reinhardtii* *MT*, more differentiated, and also carries more sex-specific genes (Ferris et al., 2010). Differentiation between the *V. carteri* *MT* alleles likely occurred after the transition to anisogamy (Hiraide et al., 2013, Hamaji et al., 2018), suggesting that selection for recombination suppression followed the appearance of selective pressure on sex-specific traits. Thus, given our findings that gene conversion is a strong predictor of both selection efficacy and differentiation levels across *C. reinhardtii* *MT*, we argue reduced gene conversion plays an important role in the accumulation of heteromorphism and eventual degeneration in anisogamous systems.

Taken together, our results suggest that in isogamous systems lacking secondary sexual characteristics, recombination plays an important role in reducing *MT* differentiation as well as degeneration through less efficient selection. Although suppressed recombination is necessary in many mating type loci to facilitate sexual reproduction and sequester sex-specific genes, there is less pressure to differentiate these regions than in the sex chromosomes of anisogamous systems, thus circumventing the degeneration characteristic of sex chromosomes. Evidence of degeneration is restricted to *MT*-limited genes in *C. reinhardtii*, which we show exhibit low diversity and less effective selection. In addition to *C. reinhardtii*, other isogamous algae also show very low levels of differentiation in shared regions (Hamaji et al., 2016, 2018, Coelho et al., 2018) suggesting that similar mechanisms are acting in the mating type loci of a broad array of species.

# Acknowledgements

Short read data are available at the European Nucleotide Archive under study accession ERP109393. This work was supported by a Natural Sciences and Engineering Research Council (NSERC) Discovery grant (RGPIN/06331-2016) and Canadian Foundation for Innovation John R. Evans Leaders fund (35591) to RWN. We thank S.I. Wright, A.M. Moses, and the Plant Evolutionary Genomics group at the University of Toronto for helpful discussions and suggestions. We also thank Brian Novogradac for facilitating computational support and HPCNODE1.

# References

- Abbott, J. K., Nordén, A. K., and Hansson, B. (2017). Sex chromosome evolution: historical insights and future perspectives. *Proc. Biol. Sci.*, 284(1854).
- Bachtrog, D. (2006). A dynamic view of sex chromosome evolution. *Curr. Opin. Genet. Dev.*, 16(6):578–585.
- Bachtrog, D. (2013). Y-chromosome evolution: emerging insights into processes of y-chromosome degeneration. *Nat. Rev. Genet.*, 14(2):113–124.
- Bachtrog, D., Kirkpatrick, M., Mank, J. E., McDaniel, S. F., Pires, J. C., Rice, W., and Valenzuela, N. (2011). Are all sex chromosomes created equal? *Trends Genet.*, 27(9):350–357.
- Bell, G. (1978). The evolution of anisogamy. *J. Theor. Biol.*, 73(2):247–270.
- Bergero, R. and Charlesworth, D. (2009). The evolution of restricted recombination in sex chromosomes. *Trends Ecol. Evol.*, 24(2):94–102.
- Berlin, S. and Ellegren, H. (2006). Fast accumulation of nonsynonymous mutations on the female-specific W chromosome in birds. *J. Mol. Evol.*, 62(1):66–72.
- Boynton, J. E., Harris, E. H., Burkhart, B. D., Lamerson, P. M., and Gillham, N. W. (1987). Transmission of mitochondrial and chloroplast genomes in crosses of *Chlamydomonas*. *Proc. Natl. Acad. Sci. U. S. A.*, 84(8):2391–2395.
- Branco, S., Badouin, H., Rodríguez de la Vega, R. C., Gouzy, J., Carpentier, F., Aguilera, G., Siguenza, S., Brandenburg, J.-T., Coelho, M. A., et al. (2017). Evolutionary strata on young mating-type chromosomes despite the lack of sexual antagonism. *Proc. Natl. Acad. Sci. U. S. A.*, 114(27):7067–7072.
- Charlesworth, B. (1978). The population genetics of anisogamy. *J. Theor. Biol.*, 73(2):347–357.
- Charlesworth, B. (1994). The nature and origin of mating types. *Curr. Biol.*, 4(8):739–741.
- Charlesworth, B. (1996). The evolution of chromosomal sex determination and dosage compensation. *Curr. Biol.*, 6(2):149–162.
- Charlesworth, B. and Charlesworth, D. (2000). The degeneration of Y chromosomes. *Philos. Trans. R. Soc. Lond. B Biol. Sci.*, 355(1403):1563–1572.
- Coelho, S. M., Gueno, J., Lipinska, A. P., Cock, J. M., and Umen, J. G. (2018). UV chromosomes and haploid sexual systems. *Trends Plant Sci.*, 23(9):794–807.
- Comeron, J. M., Williford, A., and Kliman, R. M. (2008). The Hill-Robertson effect: evolutionary consequences of weak selection and linkage in finite populations. *Heredity*, 100(1):19–31.

- Cotter, D. J., Brotman, S. M., and Wilson Sayres, M. A. (2016). Genetic diversity on the human X chromosome does not support a strict pseudoautosomal boundary. *Genetics*, 203(1):485–492.
- De Hoff, P. L., Ferris, P., Olson, B. J. S. C., Miyagi, A., Geng, S., and Umen, J. G. (2013). Species and population level molecular profiling reveals cryptic recombination and emergent asymmetry in the dimorphic mating locus of *C. reinhardtii*. *PLoS Genet.*, 9(8).
- Dujon, B. (2010). Yeast evolutionary genomics. *Nat. Rev. Genet.*, 11(7):512–524.
- Edgar, R. C. (2004). MUSCLE: multiple sequence alignment with high accuracy and high throughput. *Nucleic Acids Res.*, 32(5):1792–1797.
- Felsenstein, J. (1974). The evolutionary advantage of recombination. *Genetics*, 83(4):845–859.
- Ferris, P., Olson, B. J. S. C., De Hoff, P. L., Douglass, S., Casero, D., Prochnik, S., Geng, S., Rai, R., Grimwood, J., et al. (2010). Evolution of an expanded sex-determining locus in *Volvox*. *Science*, 328(5976):351–354.
- Ferris, P. J., Armbrust, E. V., and Goodenough, U. W. (2002). Genetic structure of the mating-type locus of *Chlamydomonas reinhardtii*. *Genetics*, 160(1):181–200.
- Ferris, P. J. and Goodenough, U. W. (1994). The mating-type locus of *chlamydomonas reinhardtii* contains highly rearranged DNA sequences. *Cell*, 76(6):1135–1145.
- Ferris, P. J. and Goodenough, U. W. (1997). Mating type in *Chlamydomonas* is specified by *mid*, the minus-dominance gene. *Genetics*, 146(3):859–869.
- Flowers, J. M., Hazzouri, K. M., Pham, G. M., Rosas, U., Bahmani, T., Khraiweh, B., Nelson, D. R., Jijakli, K., Abdrabu, R., et al. (2015). Whole-genome resequencing reveals extensive natural variation in the model green alga *Chlamydomonas reinhardtii*. *Plant Cell*, 27(9):2353–2369.
- Fraser, J. A. and Heitman, J. (2004). Evolution of fungal sex chromosomes. *Mol. Microbiol.*, 51(2):299–306.
- Galtier, N. and Duret, L. (2001). GC-content evolution in mammalian genomes: The biased gene conversion hypothesis. *Genetics*, 159:907–911.
- Gillham, N. W. (1969). Uniparental inheritance in *Chlamydomonas reinhardtii*. *Am. Nat.*, 103(932):355–388.
- Goodenough, U., Lin, H., and Lee, J.-H. (2007). Sex determination in *chlamydomonas*. *Semin. Cell Dev. Biol.*, 18(3):350–361.
- Gordo, I. and Charlesworth, B. (2001). The speed of muller’s ratchet with background selection, and the degeneration of Y chromosomes. *Genet. Res.*, 78(2):149–161.
- Graves, J. A. M. (2006). Sex chromosome specialization and degeneration in mammals. *Cell*, 124(5):901–914.
- Hamaji, T., Kawai-Toyooka, H., Uchimura, H., Suzuki, M., Noguchi, H., Minakuchi, Y., Toyoda, A., Fujiyama, A., Miyagishima, S.-Y., et al. (2018). Anisogamy evolved with a reduced sex-determining region in volvocine green algae. *Commun Biol*, 1:17.
- Hamaji, T., Mogi, Y., Ferris, P. J., Mori, T., Miyagishima, S., Kabeya, Y., Nishimura, Y., Toyoda, A., Noguchi, H., et al. (2016). Sequence of the *Gonium pectorale* mating locus reveals a complex and dynamic history of changes in volvocine algal mating haplotypes. *G3*, 6(5):1179–1189.
- Harris, R. S. (2007). *Improved Pairwise Alignment of Genomic DNA*. PhD thesis,



- Pennsylvania State University.
- Hey, J. and Kliman, R. M. (2002). Interactions between natural selection, recombination and gene density in the genes of *Drosophila*. *Genetics*, 160(2):595–608.
- Hill, W. G. and Robertson, A. (1966). The effect of linkage on limits to artificial selection. *Genet. Res.*, 8(3):269–294.
- Hill, W. G. and Robertson, A. (1968). Linkage disequilibrium in finite populations. *Theor. Appl. Genet.*, 38(6):226–231.
- Hiraide, R., Kawai-Toyooka, H., Hamaji, T., Matsuzaki, R., Kawafune, K., Abe, J., Sekimoto, H., Umen, J., and Nozaki, H. (2013). The evolution of male-female sexual dimorphism predates the gender-based divergence of the mating locus gene *MAT3/RB*. *Mol. Biol. Evol.*, 30(5):1038–1040.
- Hoekstra, R. F. (1987). The evolution of sexes. In Stearns, S. C., editor, *The Evolution of Sex and its Consequences*, volume 55, pages 59–91. Birkhäuser, Basel.
- Hough, J., Wang, W., Barrett, S. C. H., and Wright, S. I. (2017). Hill-Robertson interference reduces genetic diversity on a young plant Y-Chromosome. *Genetics*, 207(2):685–695.
- Immler, S. and Otto, S. P. (2015). The evolution of sex chromosomes in organisms with separate haploid sexes. *Evolution*, 69(3):694–708.
- Kelly, J. K. (1997). A test of neutrality based on interlocus associations. *Genetics*, 146(3):1197–1206.
- Kirkpatrick, M. (2010). How and why chromosome inversions evolve. *PLoS Biol.*, 8(9).
- Kodric-Brown, A. and Brown, J. H. (1987). Anisogamy, sexual selection, and the evolution and maintenance of sex. *Evol. Ecol.*, 1(2):95–105.
- Korunes, K. L. and Noor, M. A. F. (2017). Gene conversion and linkage: effects on genome evolution and speciation. *Mol. Ecol.*, 26(1):351–364.
- Lahn, B. T. and Page, D. C. (1999). Four evolutionary strata on the human X chromosome. *Science*, 286(5441):964–967.
- Lewontin, R. C. (1964). The interaction of selection and linkage. I. General considerations; heterotic models. *Genetics*, 49(1):49–67.
- Lin, H. and Goodenough, U. W. (2007). Gametogenesis in the *Chlamydomonas reinhardtii* minus mating type is controlled by two genes, *MID* and *MTD1*. *Genetics*, 176(2):913–925.
- Liu, H., Huang, J., Sun, X., Li, J., Hu, Y., Yu, L., Liti, G., Tian, D., Hurst, L. D., et al. (2017). Tetrad analysis in plants and fungi finds large differences in gene conversion rates but no GC bias. *Nat Ecol Evol.*
- Marais, G. (2003). Biased gene conversion: implications for genome and sex evolution. *Trends Genet.*, 19(6):330–338.
- Menkis, A., Whittle, C. A., and Johannesson, H. (2010). Gene genealogies indicates abundant gene conversions and independent evolutionary histories of the mating-type chromosomes in the evolutionary history of *Neurospora tetrasperma*. *BMC Evol. Biol.*, 10:234.
- Merchant, S. S., Prochnik, S. E., Vallon, O., Harris, E. H., Karpowicz, S. J., Witman, G. B., Terry, A., Salamov, A., et al. (2007). The *Chlamydomonas* genome reveals the evolution of key animal and plant functions. *Science*, 318(5848):245–250.
- Ming, R., Bendahmane, A., and Renner, S. S. (2011). Sex chromosomes in land

- plants. *Annu. Rev. Plant Biol.*, 62:485–514.
- Muller, H. J. (1964). The relation of recombination to mutational advance. *Mutat. Res.*, 106:2–9.
- Nakamura, S. (2010). Paternal inheritance of mitochondria in *Chlamydomonas*. *J. Plant Res.*, 123(2):163–170.
- Ness, R. W., Kraemer, S. A., Colegrave, N., and Keightley, P. D. (2016). Direct estimate of the spontaneous mutation rate uncovers the effects of drift and recombination in the *Chlamydomonas reinhardtii* plastid genome. *Mol. Biol. Evol.*, 33(3):800–808.
- Nishimura, Y. (2010). Uniparental inheritance of cpDNA and the genetic control of sexual differentiation in *Chlamydomonas reinhardtii*. *J. Plant Res.*, 123(2):149–162.
- Nishimura, Y., Misumi, O., Matsunaga, S., Higashiyama, T., Yokota, A., and Kuroiwa, T. (1999). The active digestion of uniparental chloroplast DNA in a single zygote of *Chlamydomonas reinhardtii* is revealed by using the optical tweezer. *Proc. Natl. Acad. Sci. U. S. A.*, 96(22):12577–12582.
- Pecon Slattery, J., Sanner-Wachter, L., and O’Brien, S. J. (2000). Novel gene conversion between X-Y homologues located in the nonrecombining region of the Y chromosome in Felidae (mammalia). *Proc. Natl. Acad. Sci. U. S. A.*, 97(10):5307–5312.
- Peneder, P., Wallner, B., and Vogl, C. (2017). Exchange of genetic information between therian X and Y chromosome gametologs in old evolutionary strata. *Ecol. Evol.*, 7(20):8478–8487.
- Ponnikas, S., Sigeman, H., Abbott, J. K., and Hansson, B. (2018). Why do sex chromosomes stop recombining? *Trends Genet.*, 34(7):492–503.
- R Core Team (2018). *R: A language and environment for statistical computing*. R Foundation for Statistical Computing, Vienna, Austria.
- Rosser, Z. H., Balaesque, P., and Jobling, M. A. (2009). Gene conversion between the X chromosome and the male-specific region of the Y chromosome at a translocation hotspot. *Am. J. Hum. Genet.*, 85(1):130–134.
- Sager, R. (1954). Mendelian and Non-Mendelian inheritance of streptomycin resistance in *Chlamydomonas reinhardtii*. *Proceedings of the National Academy of Sciences*, 40(5):356–363.
- Singh, N. D., Koerich, L. B., Carvalho, A. B., and Clark, A. G. (2014). Positive and purifying selection on the *Drosophila* Y chromosome. *Mol. Biol. Evol.*, 31(10):2612–2623.
- Stöck, M., Horn, A., Grossen, C., Lindtke, D., Sermier, R., Betto-Colliard, C., Dufresnes, C., Bonjour, E., Dumas, Z., et al. (2011). Ever-young sex chromosomes in European tree frogs. *PLoS Biol.*, 9(5):e1001062.
- Sun, S., Hsueh, Y.-P., and Heitman, J. (2012). Gene conversion occurs within the mating-type locus of *Cryptococcus neoformans* during sexual reproduction. *PLoS Genet.*, 8(7):e1002810.
- Trombetta, B., D’Atanasio, E., and Cruciani, F. (2017). Patterns of inter-chromosomal gene conversion on the male-specific region of the human Y chromosome. *Front. Genet.*, 8:54.
- Umen, J. G. (2011). Evolution of sex and mating loci: an expanded view from Volvocine algae. *Curr. Opin. Microbiol.*, 14(6):634–641.



- Umen, J. G. and Olson, B. J. S. C. (2012). Genomics of Volvocine Algae. *Adv. Bot. Res.*, 64:185–243.
- Visser, I. and Speekenbrink, M. (2010). depmixS4: An R package for Hidden Markov Models. *Journal of Statistical Software*, 36(7):1–21.
- Wickham, H. (2017). *tidyverse*. R package version 1.2.1.
- Wright, A. E., Dean, R., Zimmer, F., and Mank, J. E. (2016). How to make a sex chromosome. *Nat. Commun.*, 7:12087.
- Wright, A. E., Harrison, P. W., Montgomery, S. H., Pointer, M. A., and Mank, J. E. (2014). Independent stratum formation on the avian sex chromosomes reveals inter-chromosomal gene conversion and predominance of purifying selection on the W chromosome. *Evolution*, 68(11):3281–3295.

# Supplementary Information

| Strain  | Collection Location/Year       | Mating type |
|---------|--------------------------------|-------------|
| CC-2936 | Farnham, Quebec/1993           | +           |
| CC-2937 | Farnham, Quebec/1993           | +           |
| CC-3060 | Farnham, Quebec/1993           | +           |
| CC-3064 | Farnham, Quebec/1993           | +           |
| CC-3065 | Farnham, Quebec/1993           | +           |
| CC-3068 | Farnham, Quebec/1993           | +           |
| CC-3071 | Farnham, Quebec/1993           | +           |
| CC-3076 | MacDonald College, Quebec/1994 | +           |
| CC-3086 | MacDonald College, Quebec/1994 | +           |
| CC-2935 | Farnham, Quebec/1993           | -           |
| CC-2938 | Farnham, Quebec/1993           | -           |
| CC-3059 | Farnham, Quebec/1993           | -           |
| CC-3061 | Farnham, Quebec/1993           | -           |
| CC-3062 | Farnham, Quebec/1993           | -           |
| CC-3063 | Farnham, Quebec/1993           | -           |
| CC-3073 | Farnham, Quebec/1993           | -           |
| CC-3075 | MacDonald College, Quebec/1994 | -           |
| CC-3079 | MacDonald College, Quebec/1994 | -           |
| CC-3084 | MacDonald College, Quebec/1994 | -           |

Table S1: Field strains of *C. reinhardtii* used in this study. All strains were obtained from the *Chlamydomonas* Resource Center ([chlamycollection.org](http://chlamycollection.org)). Mating types of *MT*<sup>-</sup> strains CC-3059 and CC-3062 are mislabelled as *MT*<sup>+</sup> on the Resource Center website, and are instead *MT*<sup>-</sup> individuals (R.J. Craig, personal communication)
